# Supplementary material for: Cross-canyon variability in zooplankton backscattering strength in a river-influenced upwelling area
Source: Copernicus journal article supplement (doi:10.5194/os-21-1833-2025), 2025-08-29
Supplement: Supplementary file 1 [file os-21-1833-2025-supplement.pdf]

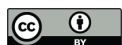

*Supplement of*

## **Cross-canyon variability in zooplankton backscattering strength in a river-influenced upwelling area**

**Macarena Díaz-Astudillo et al.**

*Correspondence to:* Macarena Díaz-Astudillo ([macarenapaz.da@gmail.com](mailto:macarenapaz.da@gmail.com))

The copyright of individual parts of the supplement might differ from the article licence.

Table S1: Details of each of the 16 transects included in the study analyses. The RapidPro CTD was not deployed in 2 transects, outlined below. ET: eastern transect, WT: western transect.

| Transect N° | Date       | Start Time | Canyon Position | ADCP | CTD |
|-------------|------------|------------|-----------------|------|-----|
| 1           | 27-07-2023 | 20:45      | ET              | Yes  | Yes |
| 2           | 27-07-2023 | 22:00      | WT              | Yes  | No  |
| 3           | 28-07-2023 | 01:20      | ET              | Yes  | Yes |
| 4           | 28-07-2023 | 02:20      | WT              | Yes  | Yes |
| 5           | 28-07-2023 | 04:45      | ET              | Yes  | Yes |
| 6           | 28-07-2023 | 05:30      | WT              | Yes  | Yes |
| 7           | 28-07-2023 | 07:10      | ET              | Yes  | No  |
| 8           | 28-07-2023 | 08:30      | WT              | Yes  | Yes |
| 9           | 28-07-2023 | 10:40      | ET              | Yes  | Yes |
| 10          | 28-07-2023 | 12:00      | WT              | Yes  | Yes |
| 11          | 28-07-2023 | 14:30      | ET              | Yes  | Yes |
| 12          | 28-07-2023 | 15:30      | WT              | Yes  | Yes |
| 13          | 28-07-2023 | 17:30      | ET              | Yes  | Yes |
| 14          | 28-07-2023 | 19:00      | WT              | Yes  | Yes |
| 15          | 28-07-2023 | 21:00      | ET              | Yes  | Yes |
| 16          | 28-07-2023 | 22:00      | WT              | Yes  | Yes |

Table S2: Details on the zooplankton sampling carried out before (day samples) and after (night samples) the experiment.

| Sample Code | Station | Slope    | Date       | Local time | D/N   | Stratum |
|-------------|---------|----------|------------|------------|-------|---------|
| E1_1        | E1      | Northern | 27-03-2023 | 15:10      | Day   | 0-50    |
| E1_2        | E1      | Northern | 27-03-2023 | 14:20      | Day   | 50-100  |
| E2_1        | E2      | Southern | 27-03-2023 | 17:30      | Day   | 0-50    |
| E2_2        | E2      | Southern | 27-03-2023 | 16:10      | Day   | 50-100  |
| E1_3        | E1      | Northern | 29-03-2023 | 01:30      | Night | 0-50    |
| E1_4        | E1      | Northern | 29-03-2023 | 00:50      | Night | 50-100  |
| E2_3        | E2      | Southern | 29-03-2023 | 02:50      | Night | 0-50    |
| E2_4        | E2      | Southern | 29-03-2023 | 02:00      | Night | 50-100  |

To put the observations in the context of the environmental conditions for the region, the time series of the wind vector, Biobío river discharge and Concepcion Bay tides were obtained for July-August 2023 (Fig. S1). During July-August, the winds were mainly from the south with intensities below  $12 \text{ m s}^{-1}$ , and the northern winds were weak (c.a.  $5 \text{ m s}^{-1}$ ). During the ADCP measurements, winds were weak and mainly from the north. The tidal cycle was in late ebb with a range of 1 m and a river discharge of  $\sim 1600 \text{ m}^3 \text{ s}^{-1}$ .

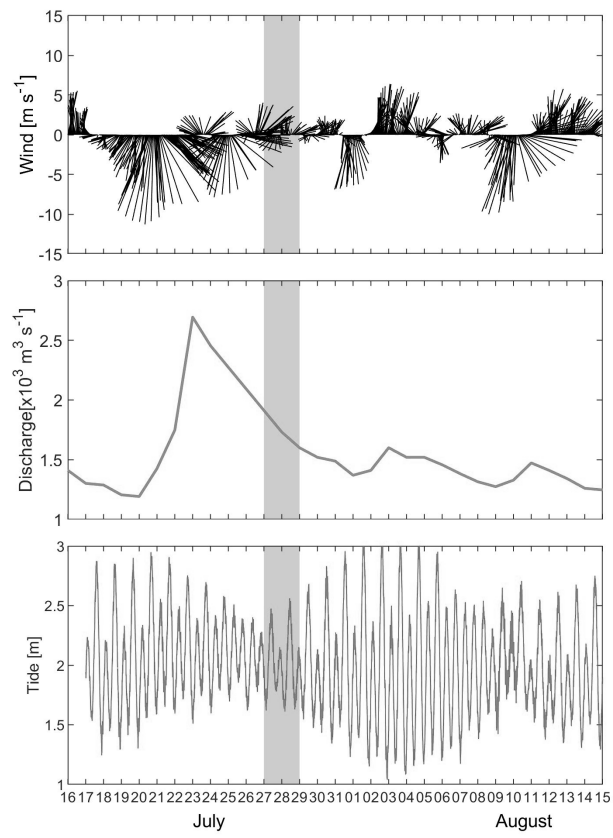

Figure S1: Time series of wind vectors, Biobío river discharge, and tidal cycles during the study period (in gray).

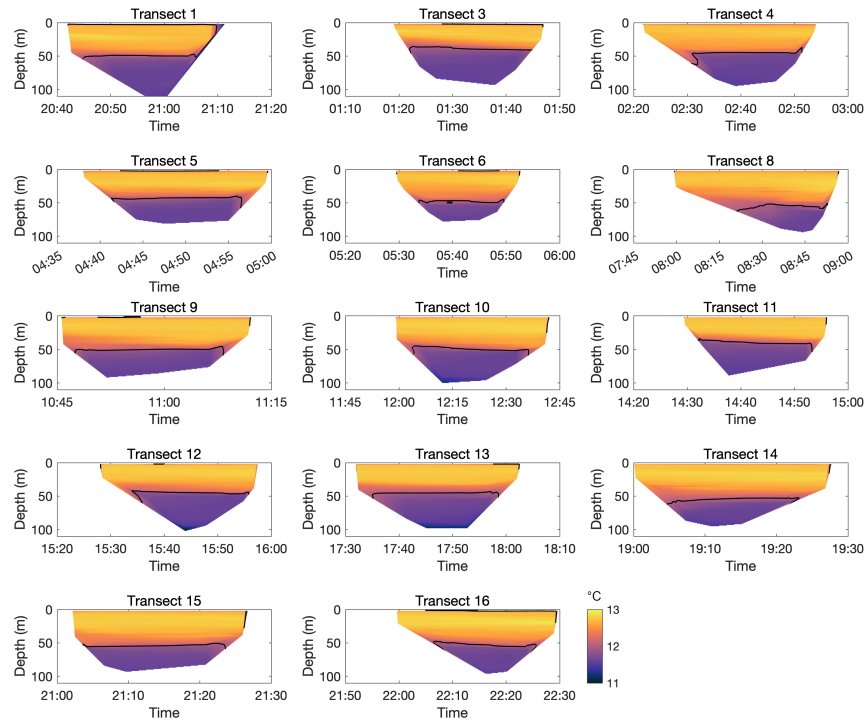

Figure S2: Cross-canyon sections of temperature. The 12°C temperature contour is highlighted in black.

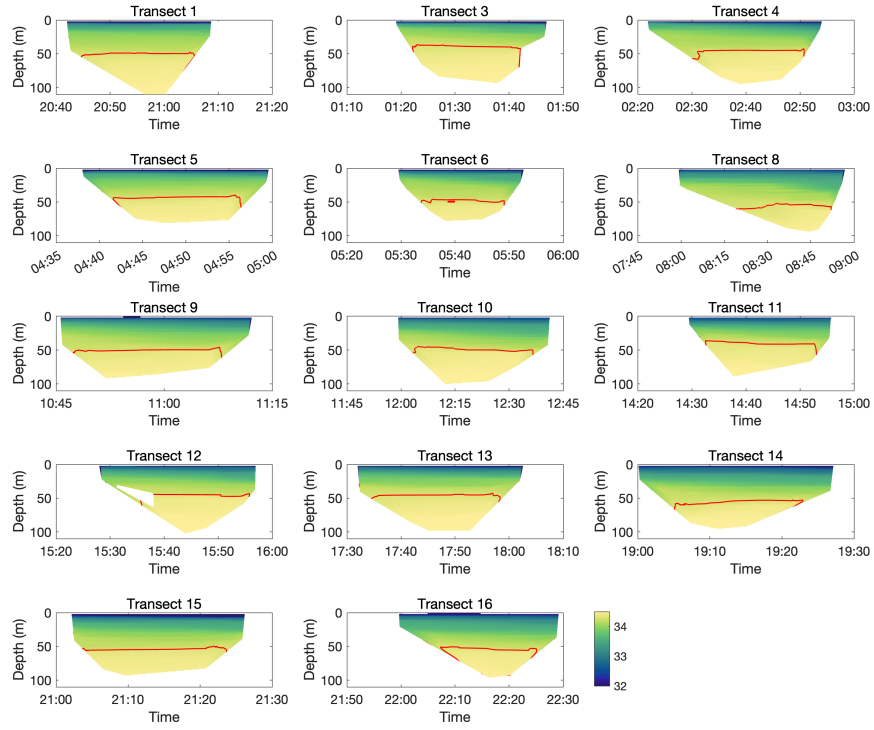

Figure S3: Cross-canyon sections of salinity. The 34 salinity contour is highlighted in red.

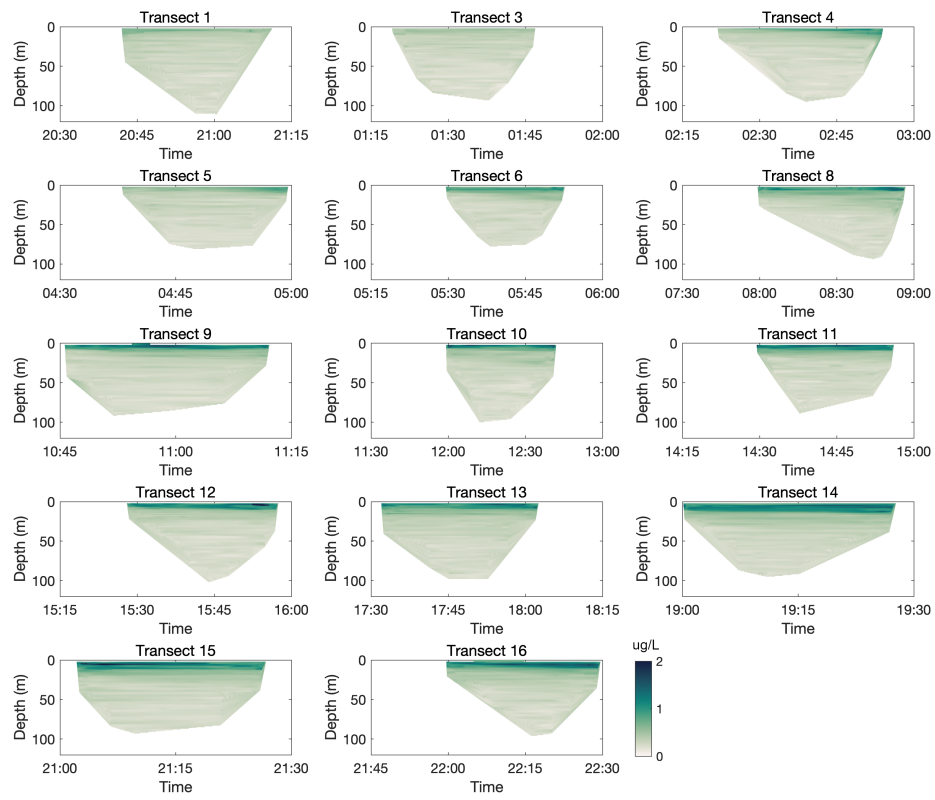

Figure S4: Cross-canyon sections of chlorophyll-a.

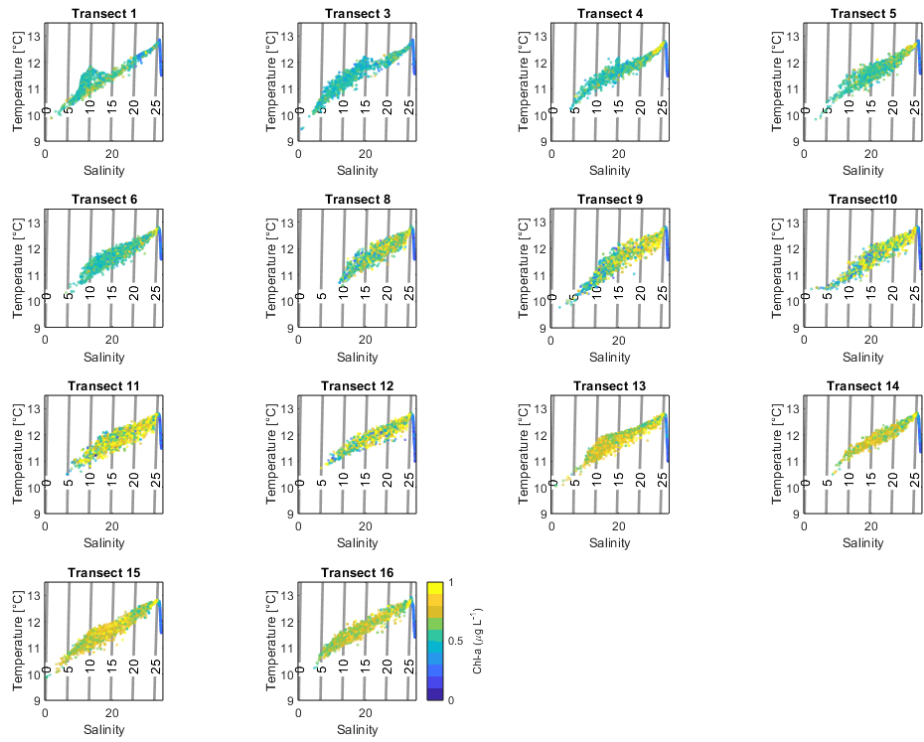

Figure S5: Temperature-salinity plots for each transect with chlorophyll-a concentration in colors.

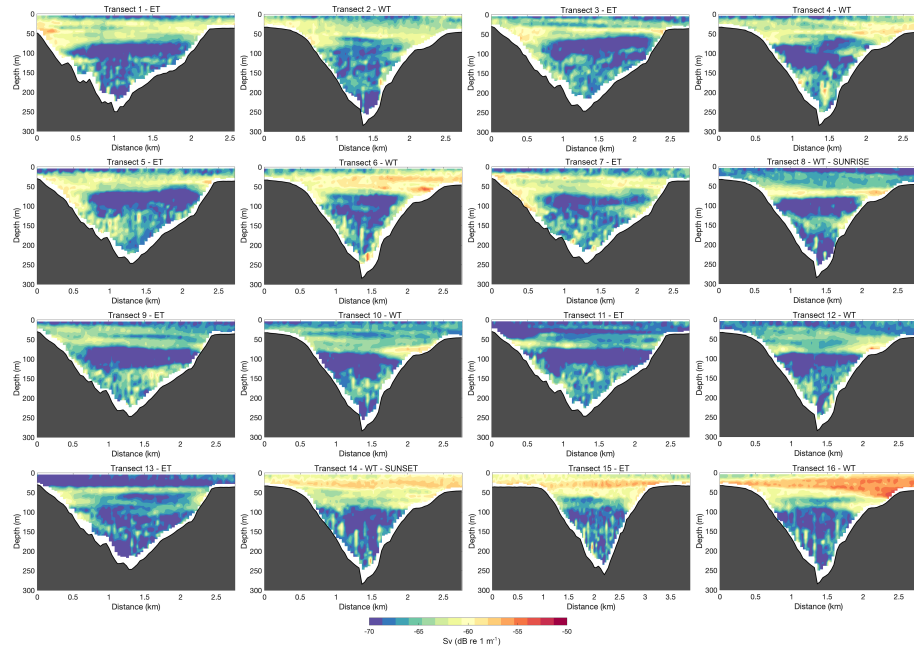

Figure S6: Cross-canyon sections of the mean volume backscattering strength (Sv). In all transects, the left side of the canyon shows the northern slope, and the right side, the southern slope. Transect 8 was conducted 37 minutes after sunrise, and transect 14, 55 minutes after sunset.
